# Supplementary material for: Macrocyclic Ionic Liquids with Amino Acid Residues: Synthesis and Influence of Thiacalix[4]arene Conformation on Thermal Stability
Source: MDPI journal article supplement (doi:10.3390/molecules27228006), 2022-11-18
Supplement: s1 [file s1]

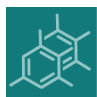

## Supplementary Information

For

# Macrocyclic Ionic Liquids with Amino Acid Residues: Synthesis and Influence of Thiacalix[4]arene Conformation on Thermal Stability

Olga Terenteva, Azamat Bismukhametov, Alexander Gerasimov, Pavel Padnya and Ivan Stoikov

## Content

|                                                                                          |   |   |   |       |
|------------------------------------------------------------------------------------------|---|---|---|-------|
| Figures S1-S10. <sup>1</sup> H NMR spectra of the compounds 4, 6, 11-13, 15, 17-19, 21   | . | . | . | 2-6   |
| Figures S11-S18. <sup>13</sup> C NMR spectra of the compounds 4, 6, 11-13, 15, 17-19, 21 | . | . | . | 7-10  |
| Figures S19-S26. FT-IR spectra of the compounds 4, 6, 11-13, 15, 17-19, 21               | . | . | . | 11-14 |
| Figures S27-S33. HRMS spectra of the compounds 4, 6, 11-13, 15, 17-19, 21                | . | . | . | 15-18 |
| Figure S34. DSC curves of the compounds 16-21                                            | . | . | . | 19    |

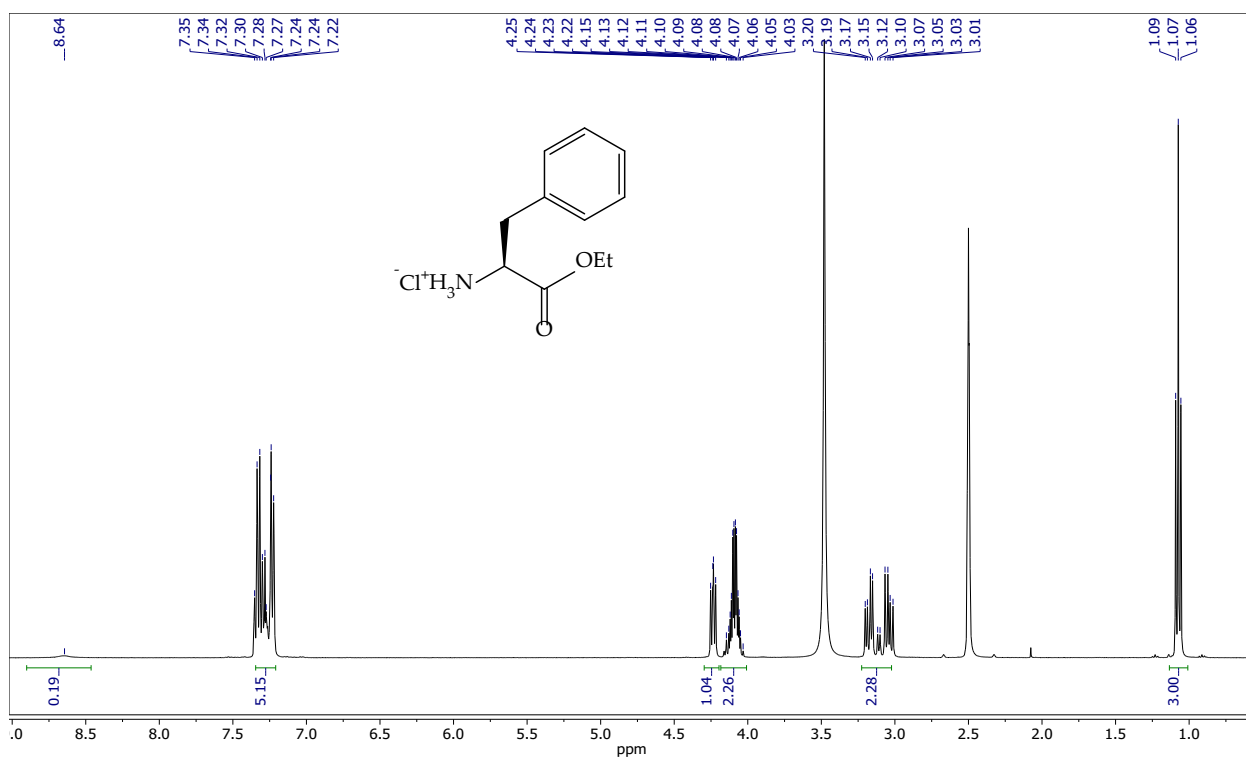

**Figure S1.** <sup>1</sup>H NMR spectrum of the compound **4**, DMSO-*d*<sub>6</sub>, 298 K, 400 MHz.

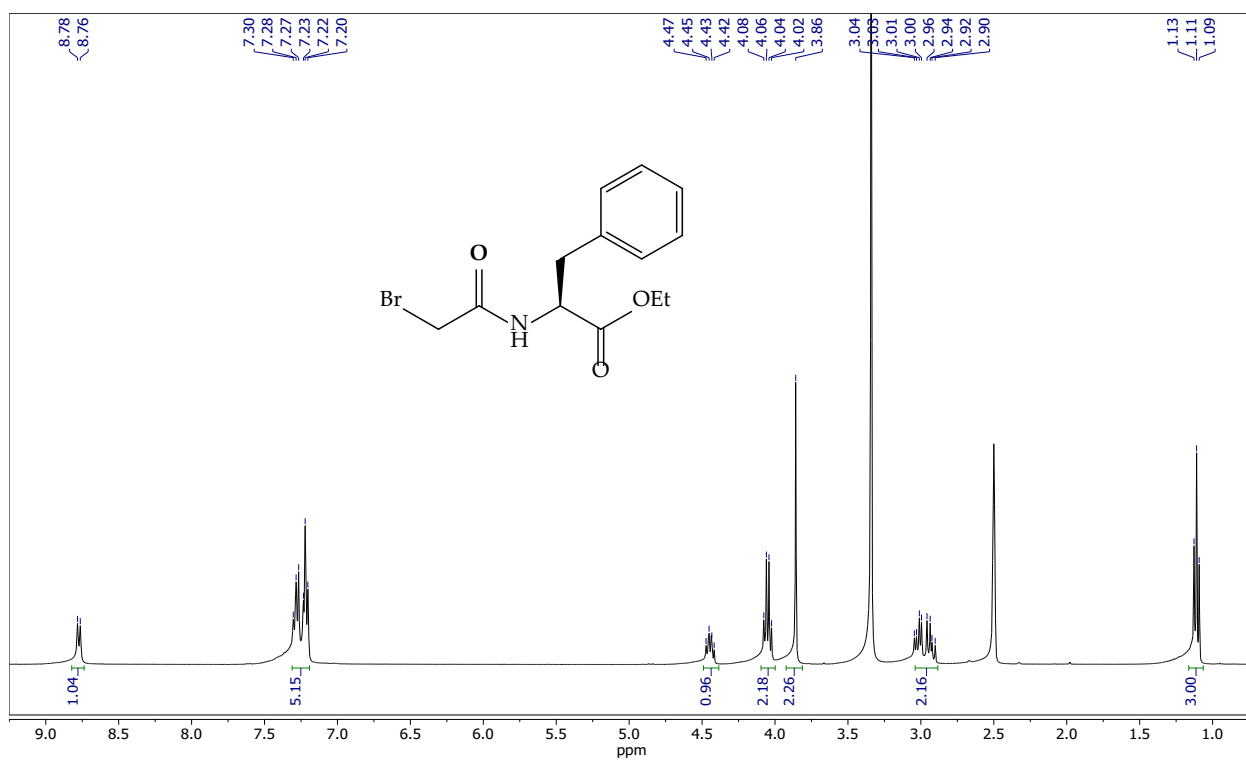

**Figure S2.** <sup>1</sup>H NMR spectrum of the compound **6**, DMSO-*d*<sub>6</sub>, 298 K, 400 MHz.

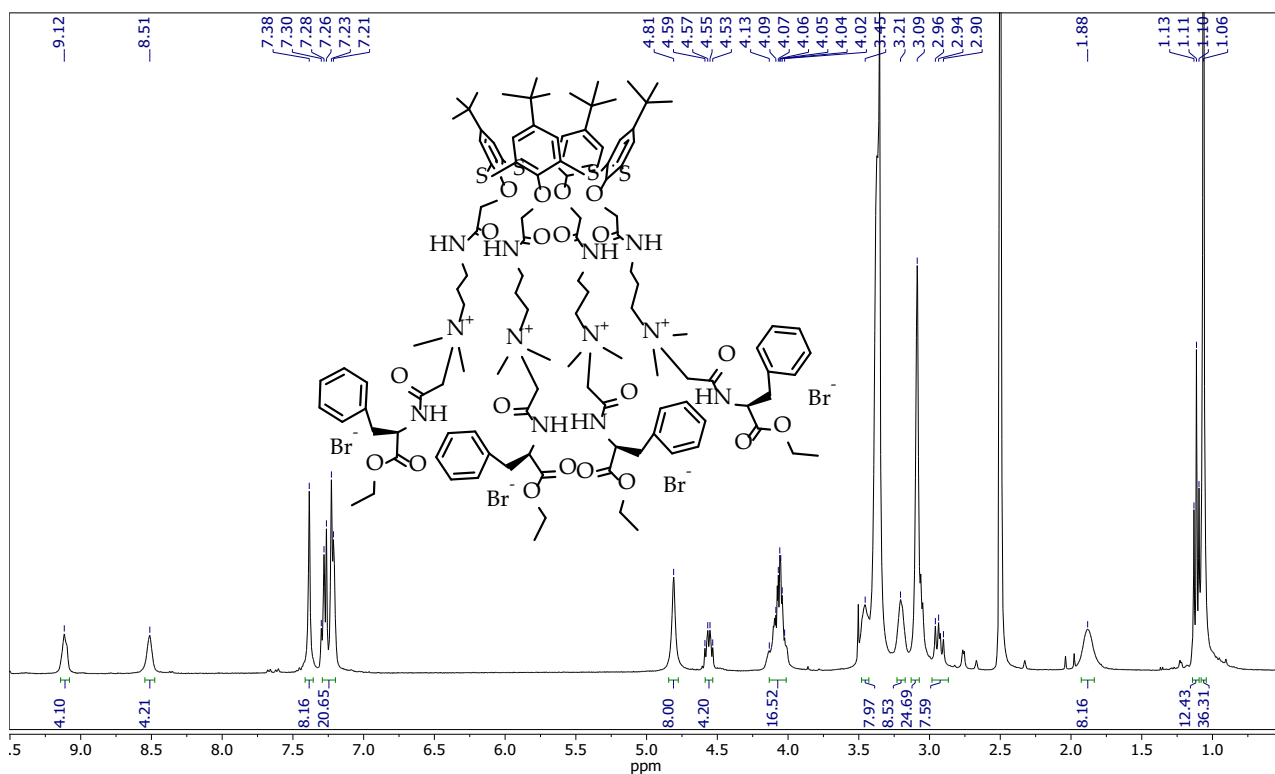

**Figure S3.**  $^1\text{H}$  NMR spectrum of the compound **11** (*cone*), DMSO- $d_6$ , 298 K, 400 MHz.

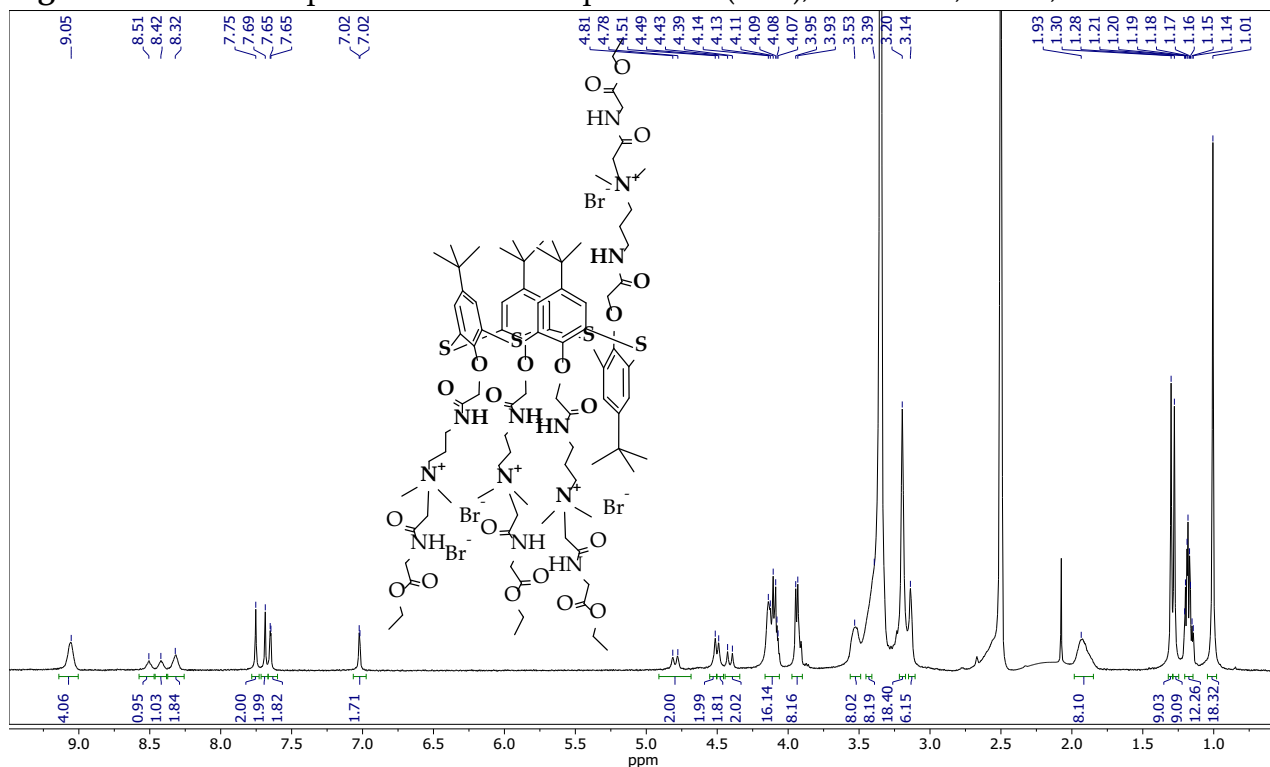

**Figure S4.**  $^1\text{H}$  NMR spectrum of the compound **12** (*partial cone*), DMSO- $d_6$ , 298 K, 400 MHz.

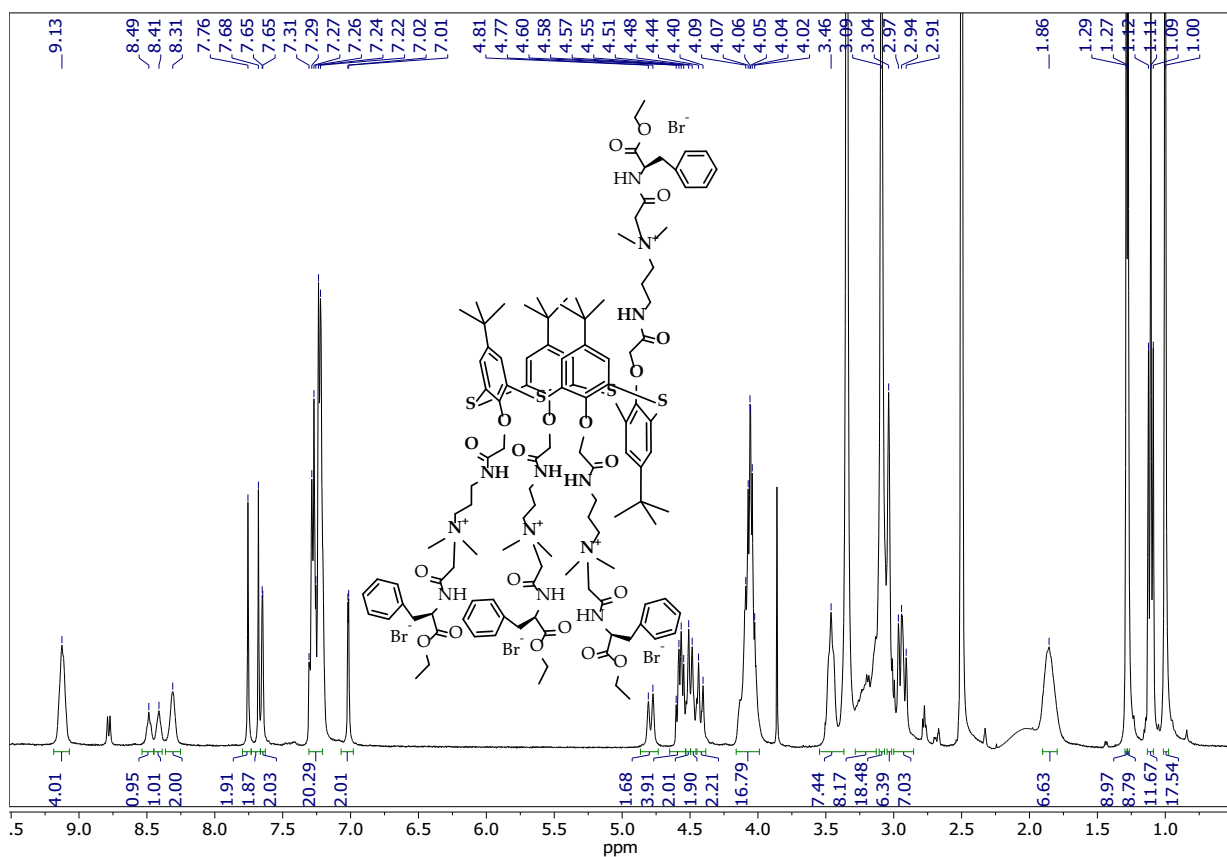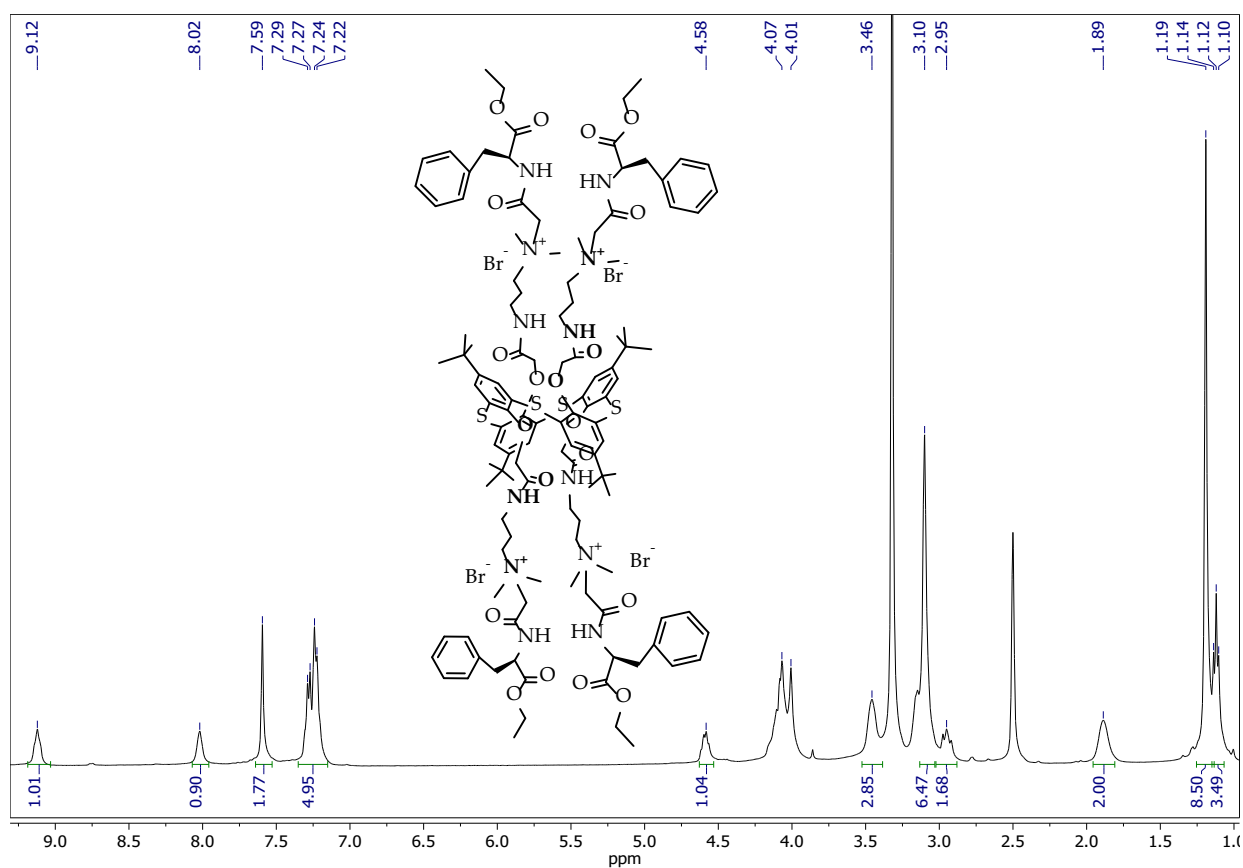

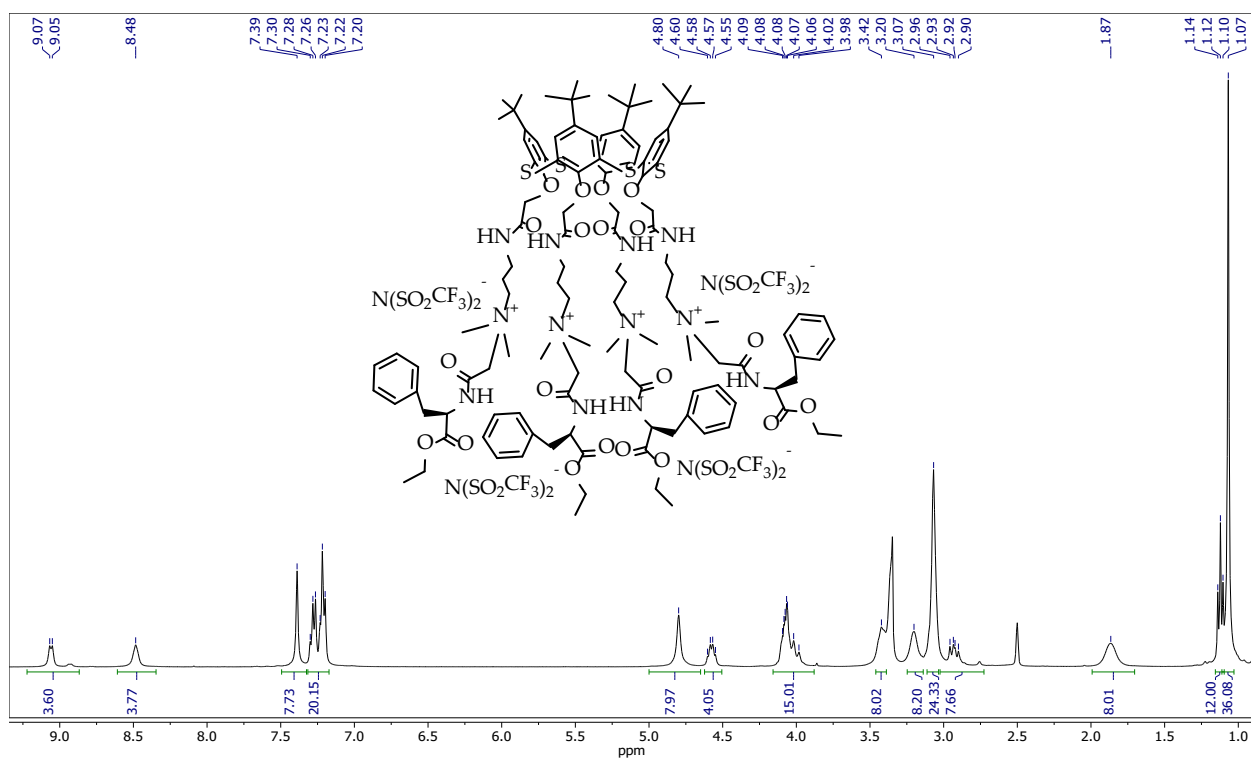

**Figure S7.** <sup>1</sup>H NMR spectrum of the compound **17** (cone), DMSO-*d*<sub>6</sub>, 298 K, 400 MHz.

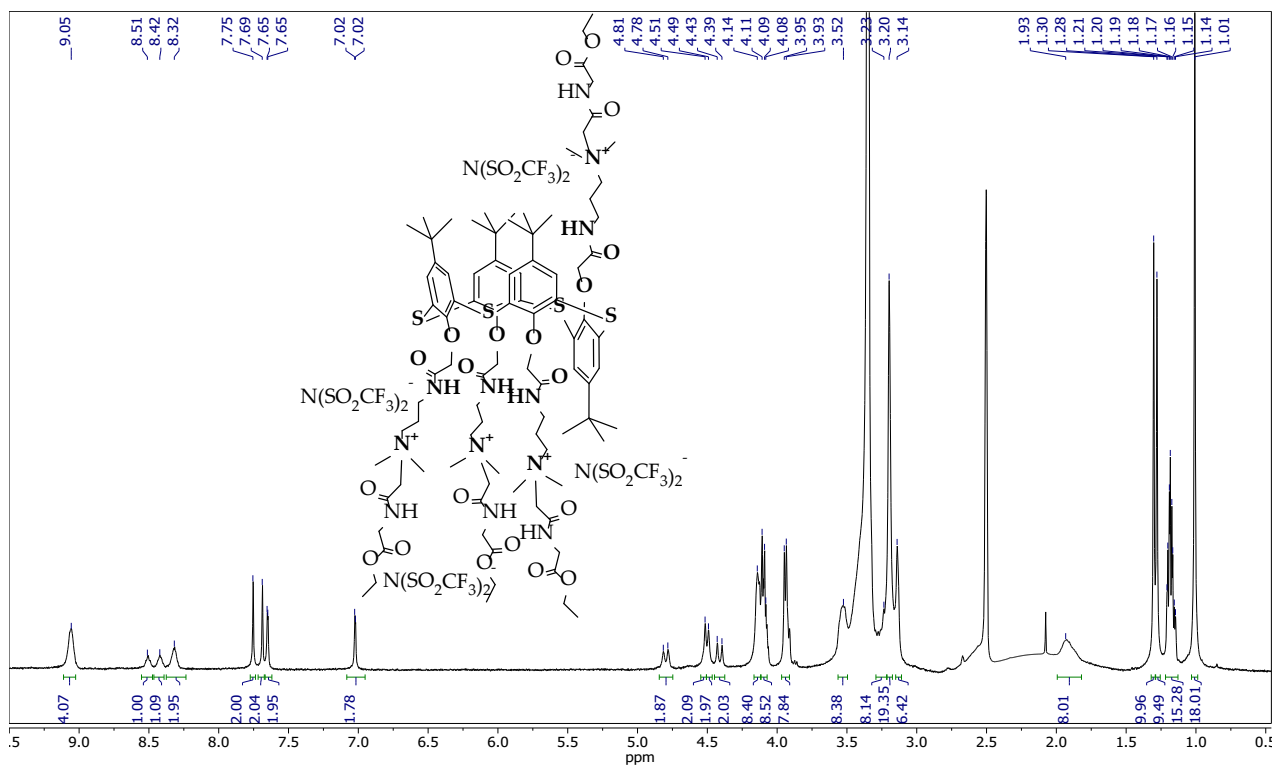

**Figure S8.** <sup>1</sup>H NMR spectrum of the compound **18** (partial cone), DMSO-*d*<sub>6</sub>, 298 K, 400 MHz.

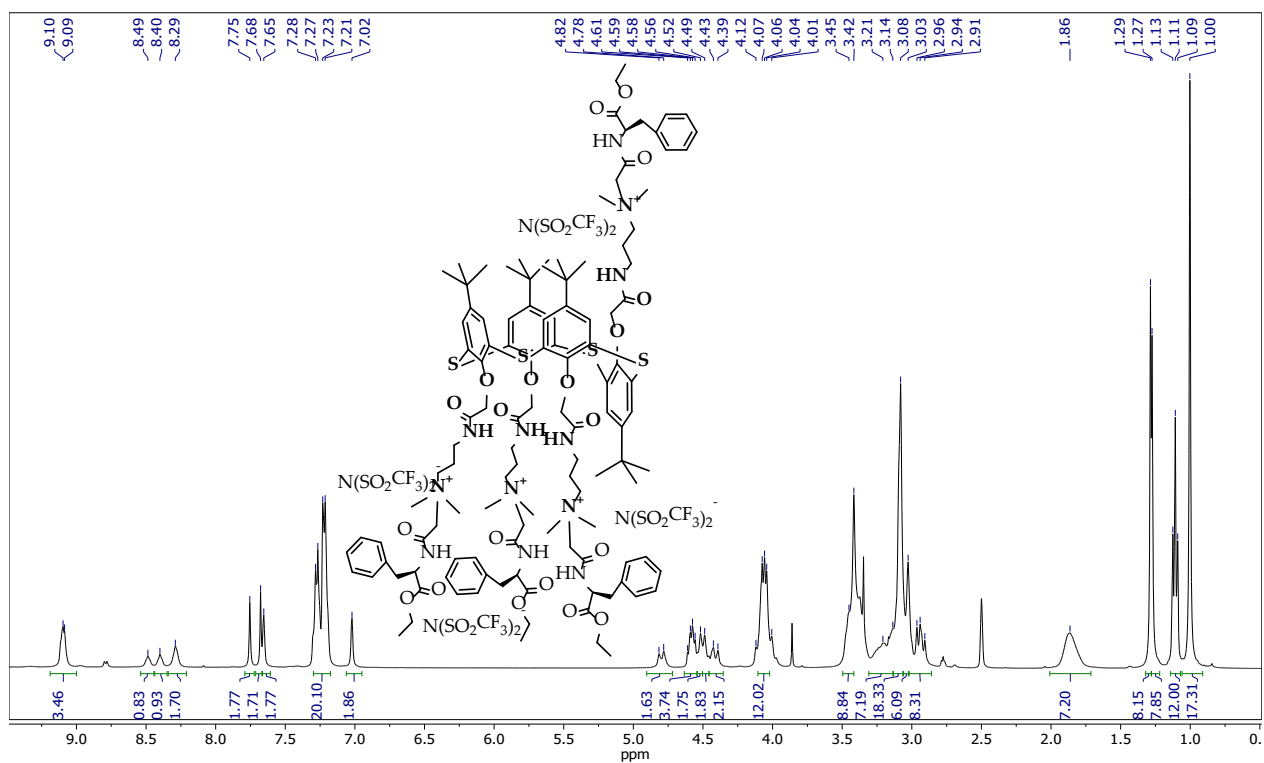

**Figure S9.**  $^1\text{H}$  NMR spectrum of the compound **19** (*partial cone*), DMSO- $d_6$ , 298 K, 400 MHz.

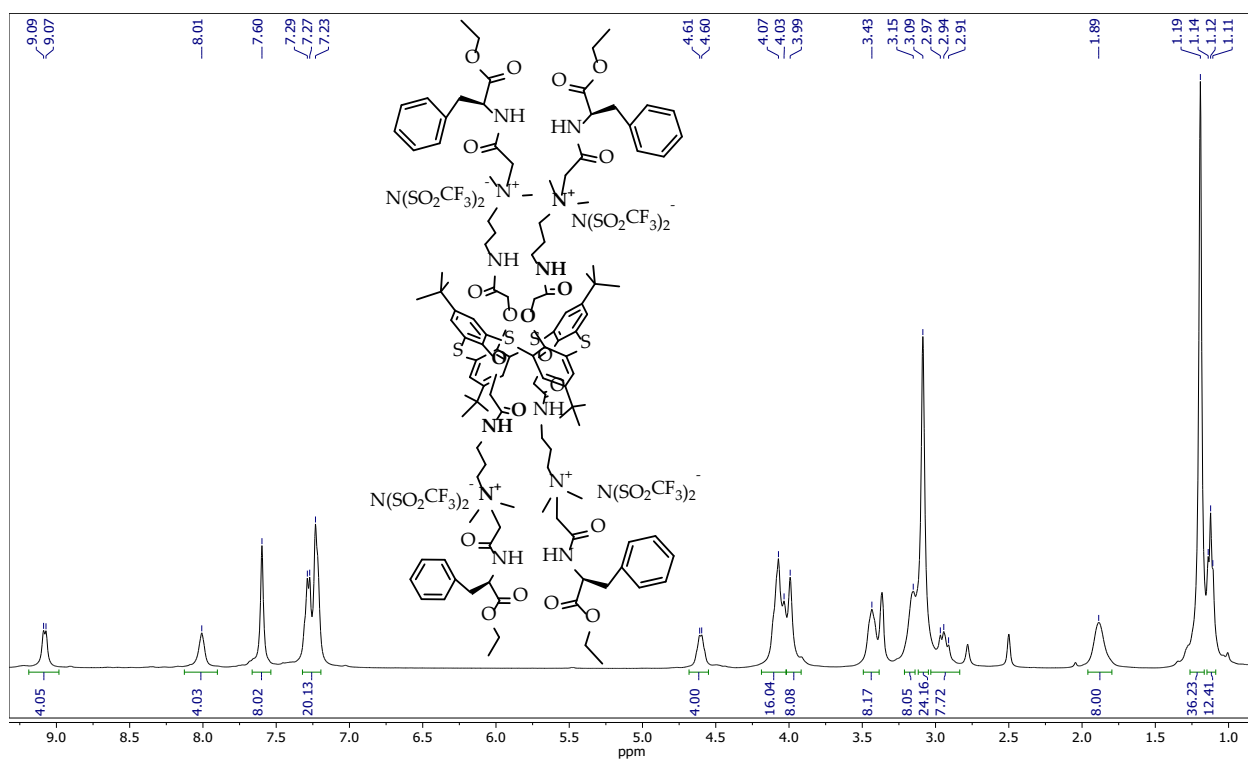

**Figure S10.**  $^1\text{H}$  NMR spectrum of the compound **21** (*1,3-alternate*), DMSO- $d_6$ , 298 K, 400 MHz.

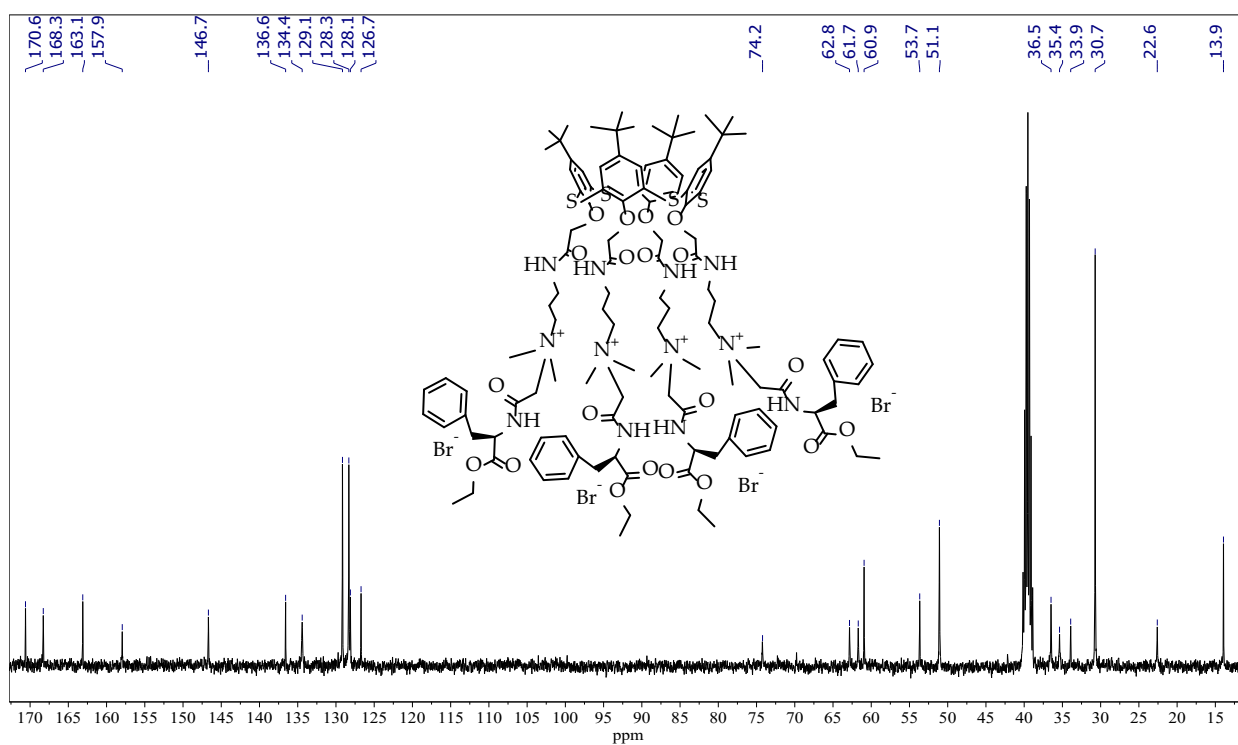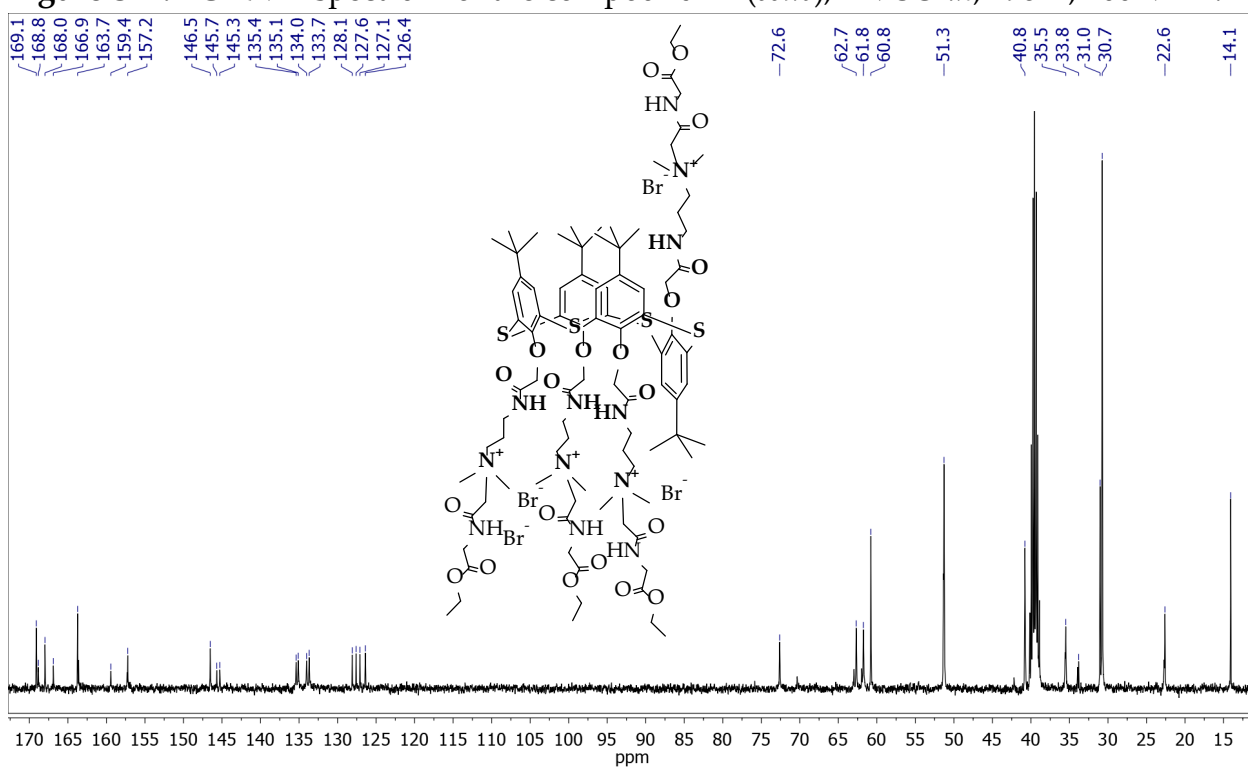

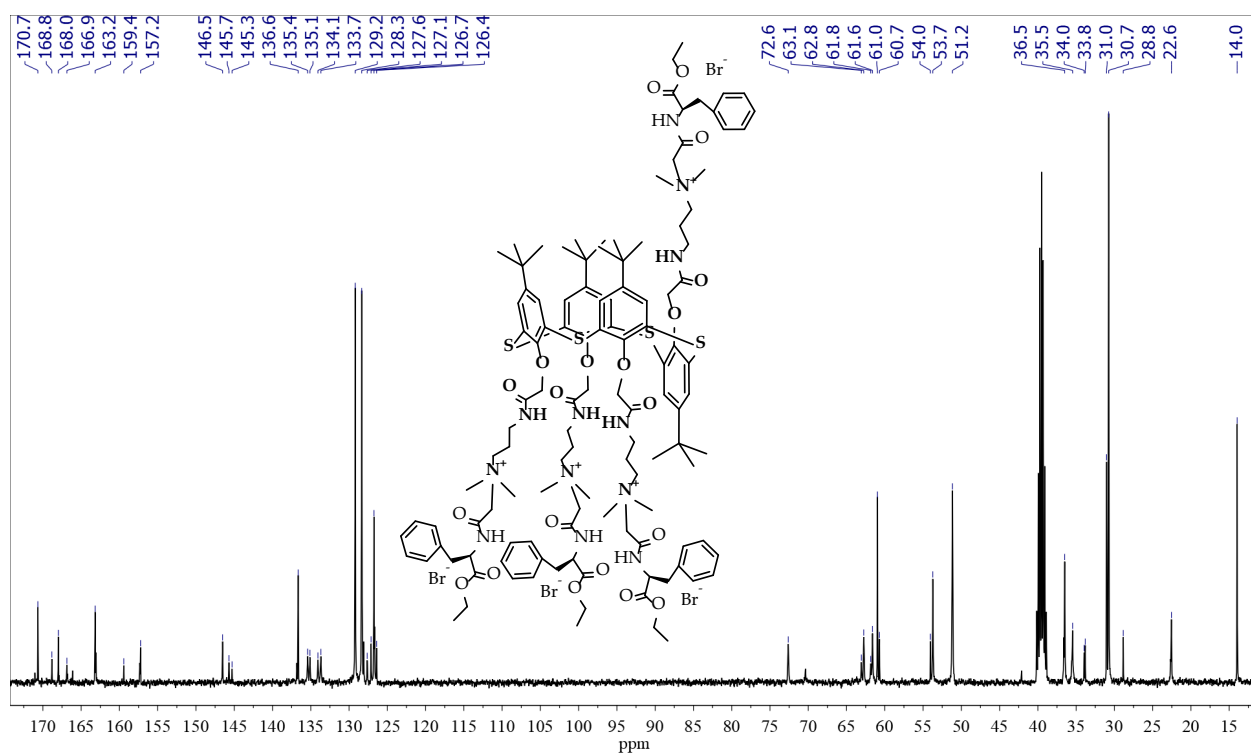

**Figure S13.**  $^{13}\text{C}$  NMR spectrum of the compound **13** (*partial cone*), DMSO- $d_6$ , 298 K, 100 MHz.

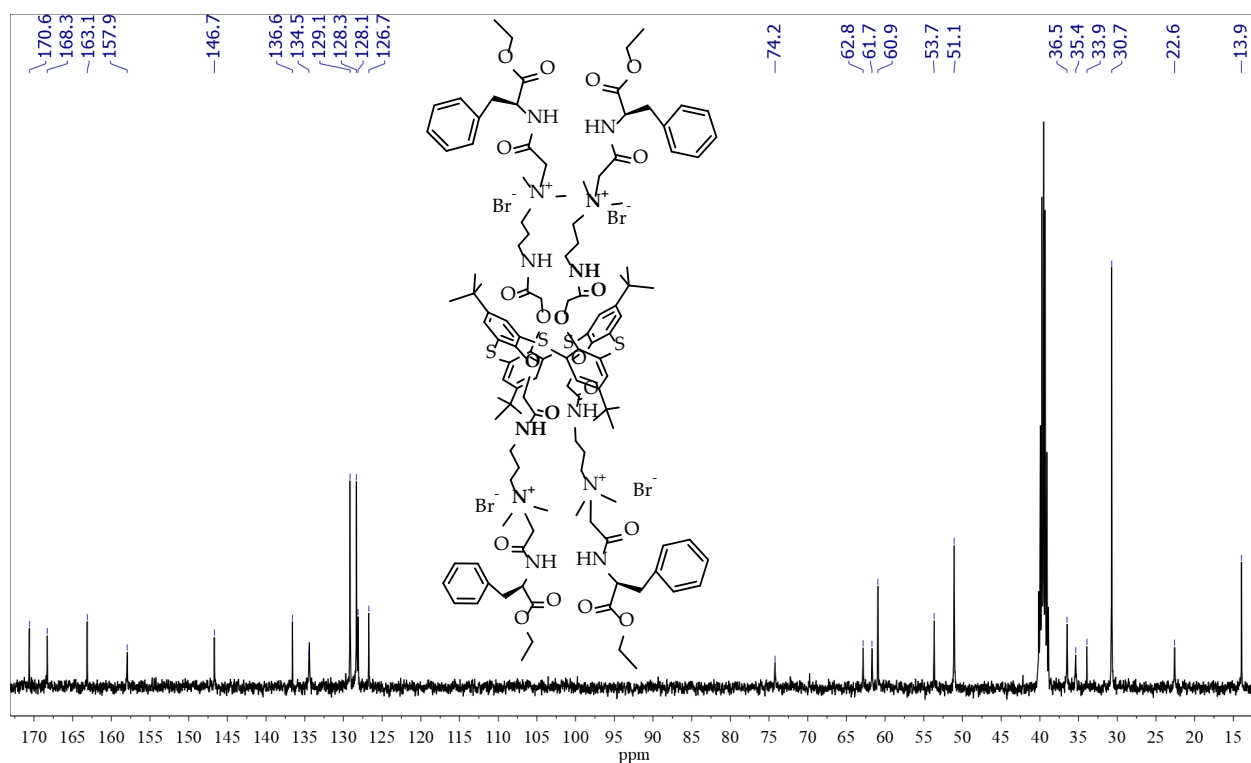

**Figure S14.**  $^{13}\text{C}$  NMR spectrum of the compound **15** (*1,3-alternate*), DMSO- $d_6$ , 298 K, 100 MHz.



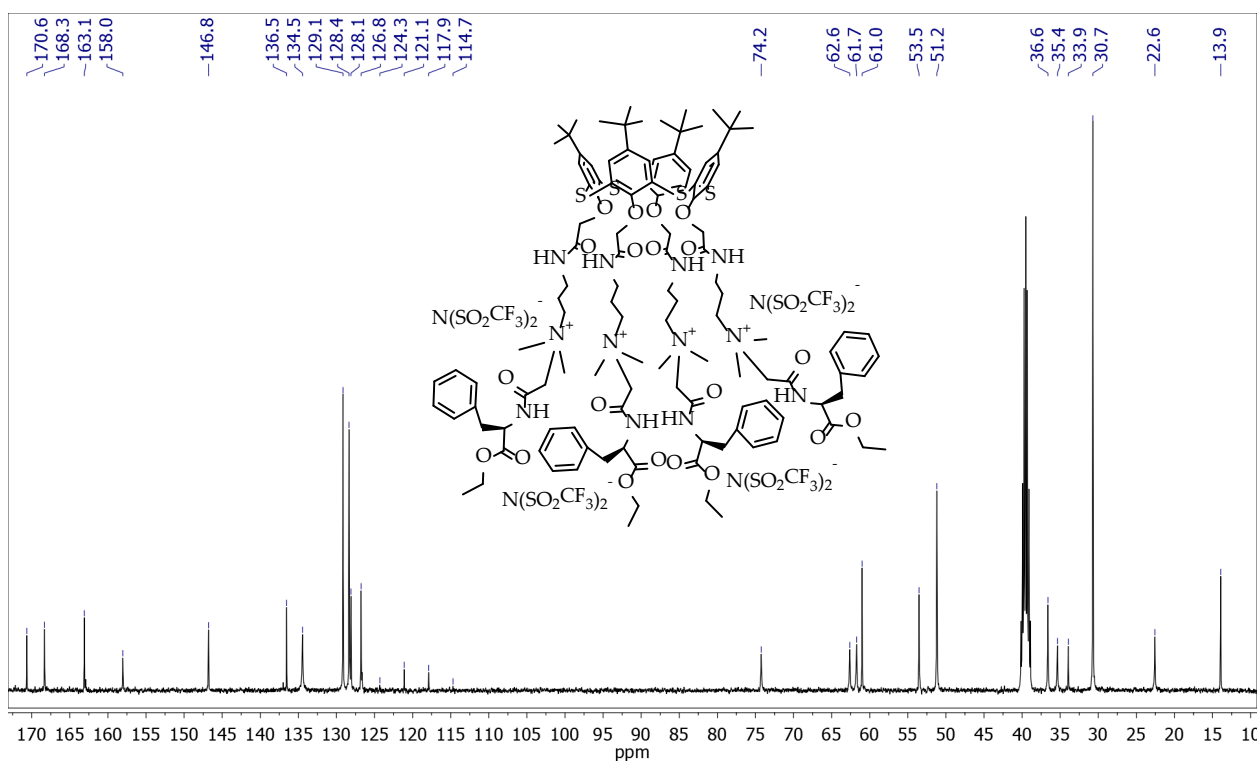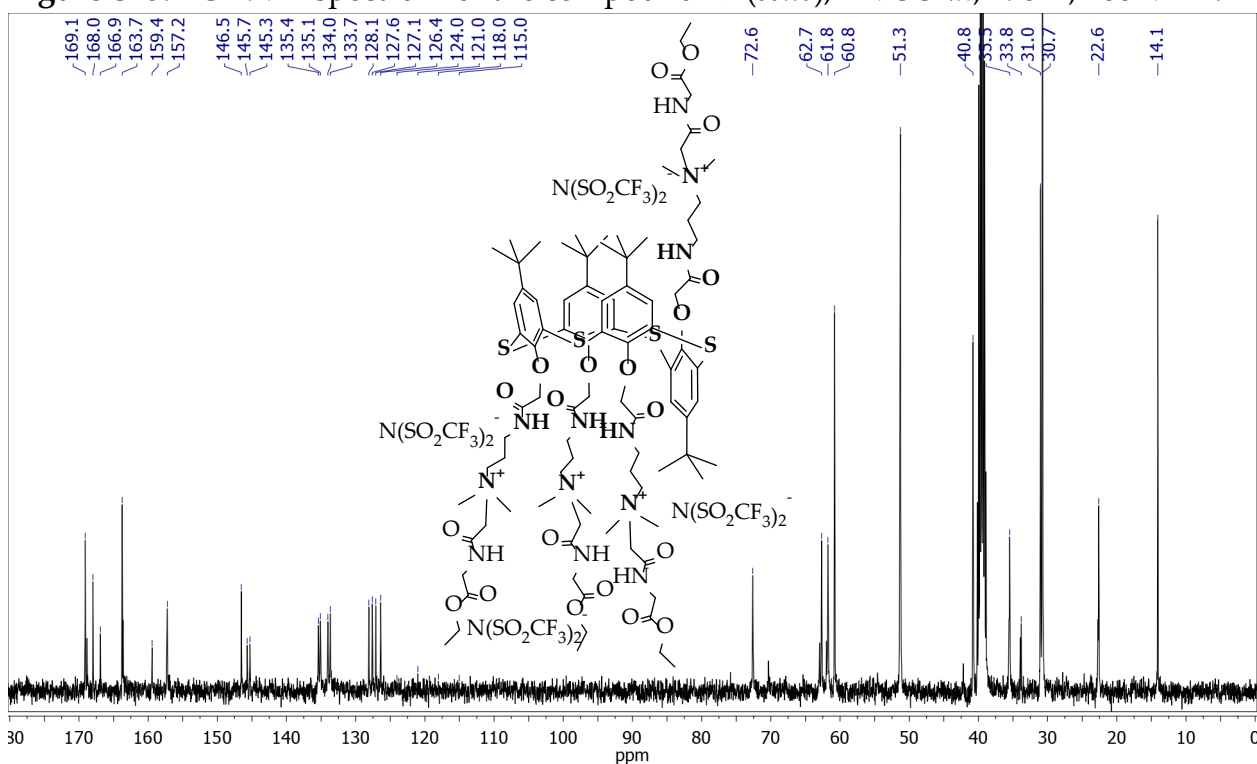

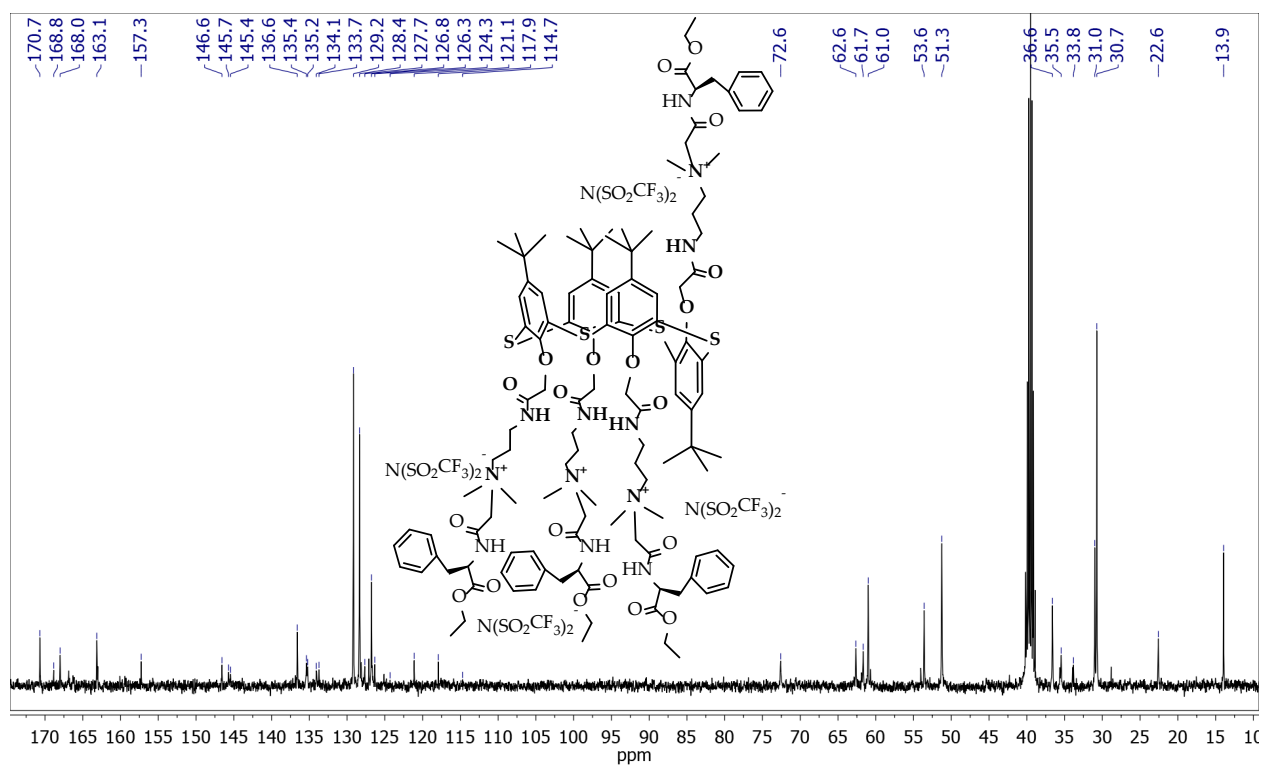

**Figure S17.** <sup>13</sup>C NMR spectrum of the compound **19** (*partial cone*), DMSO-*d*<sub>6</sub>, 298 K, 100 MHz.

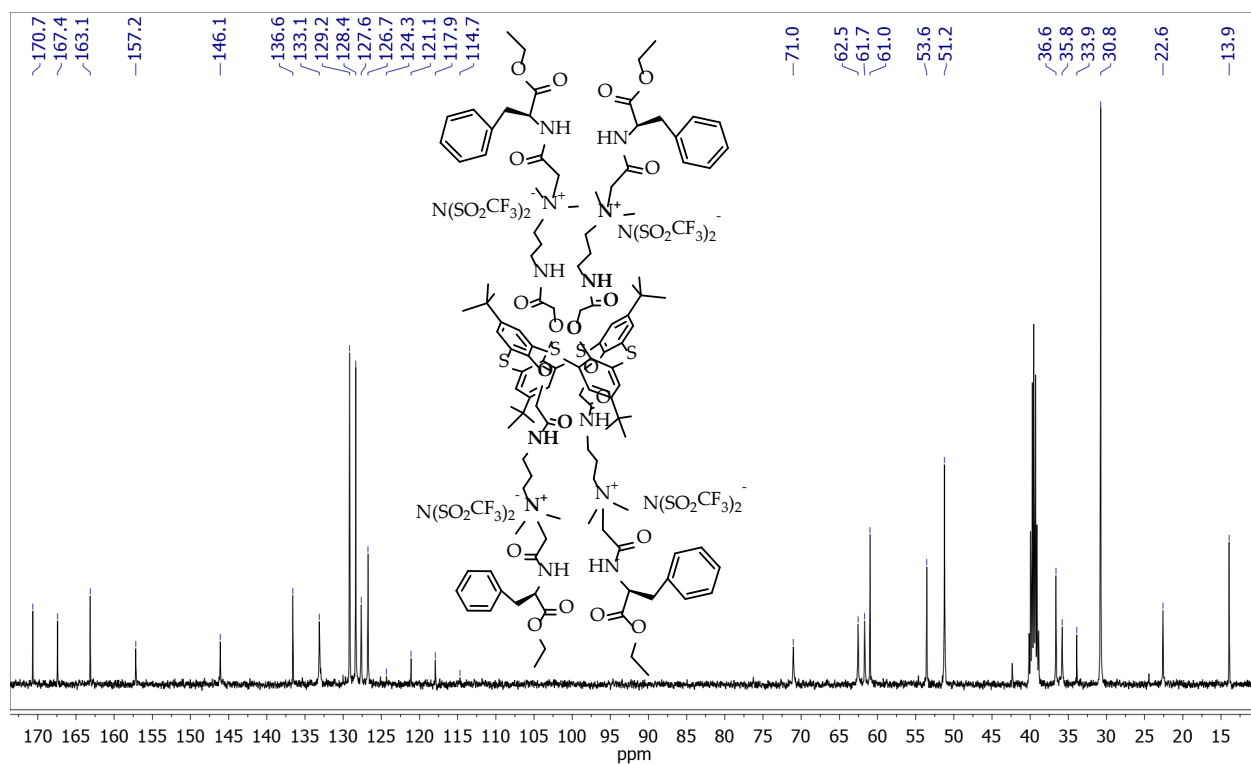

**Figure S18.** <sup>13</sup>C NMR spectrum of the compound **21** (*1,3-alternate*), DMSO-*d*<sub>6</sub>, 298 K, 100 MHz.

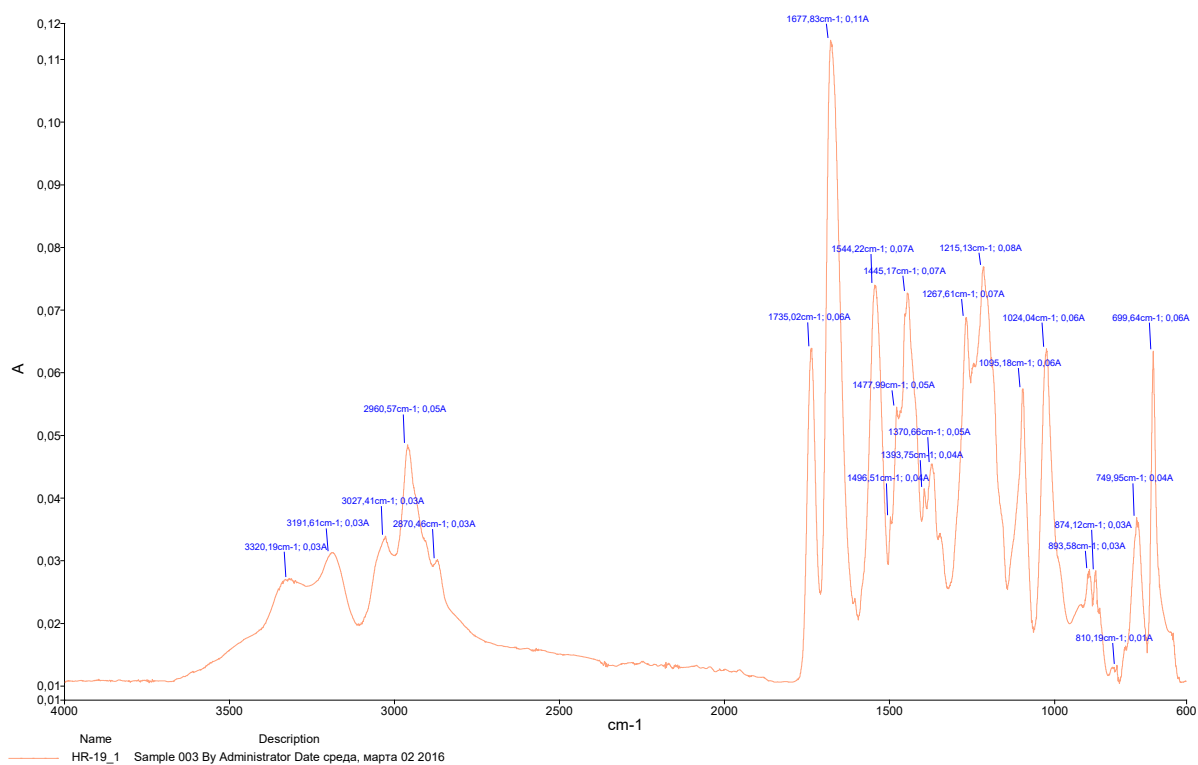

**Figure S19.** IR spectrum of the compound **11** (*cone*).

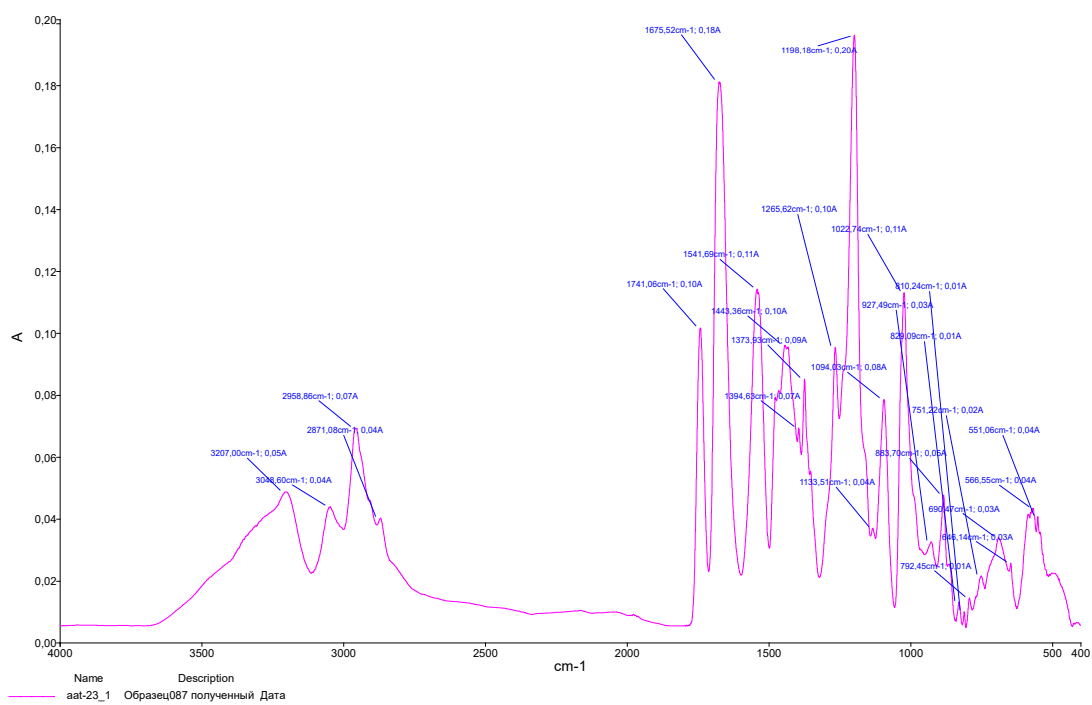

**Figure S20.** IR spectrum of the compound **12** (*partial cone*).

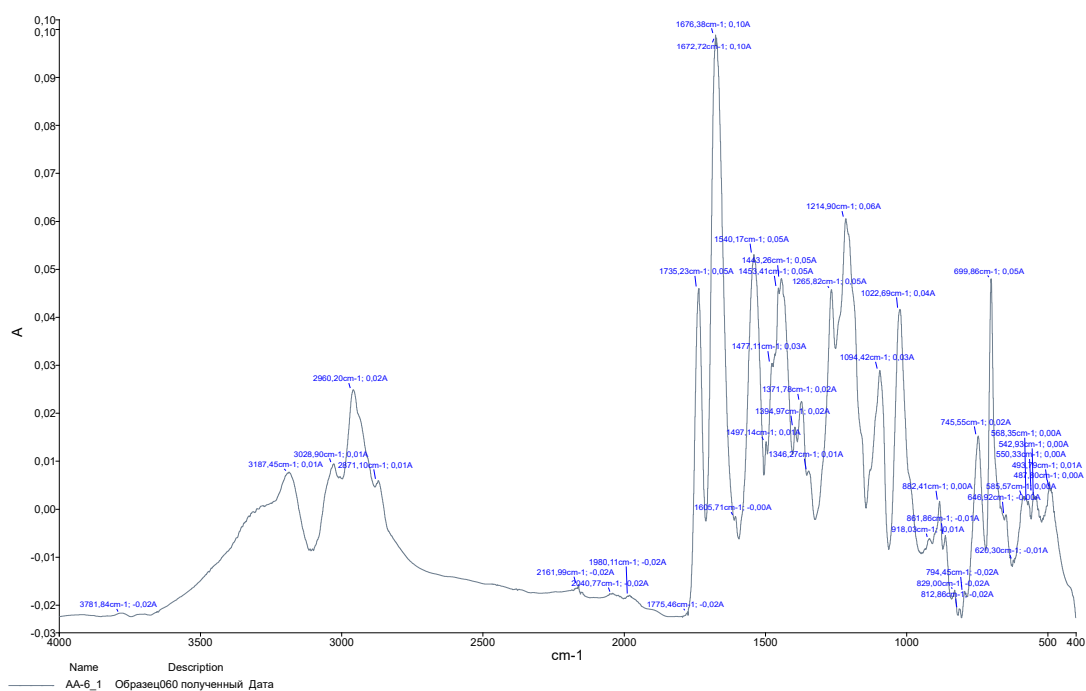

Figure S21. IR spectrum of the compound **13** (*partial cone*).

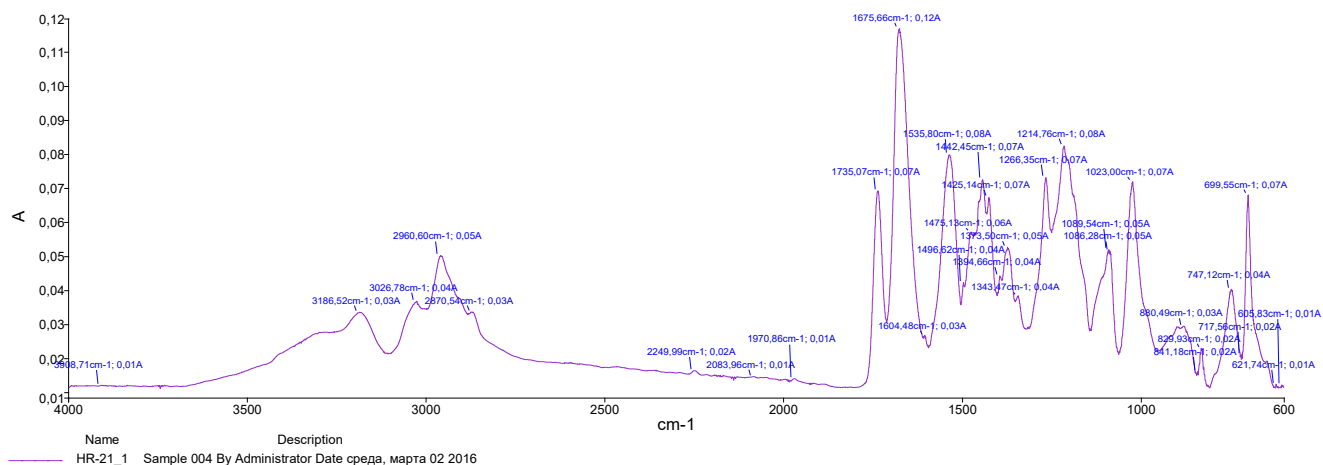

Figure S22. IR spectrum of the compound **15** (*1,3-alternate*).

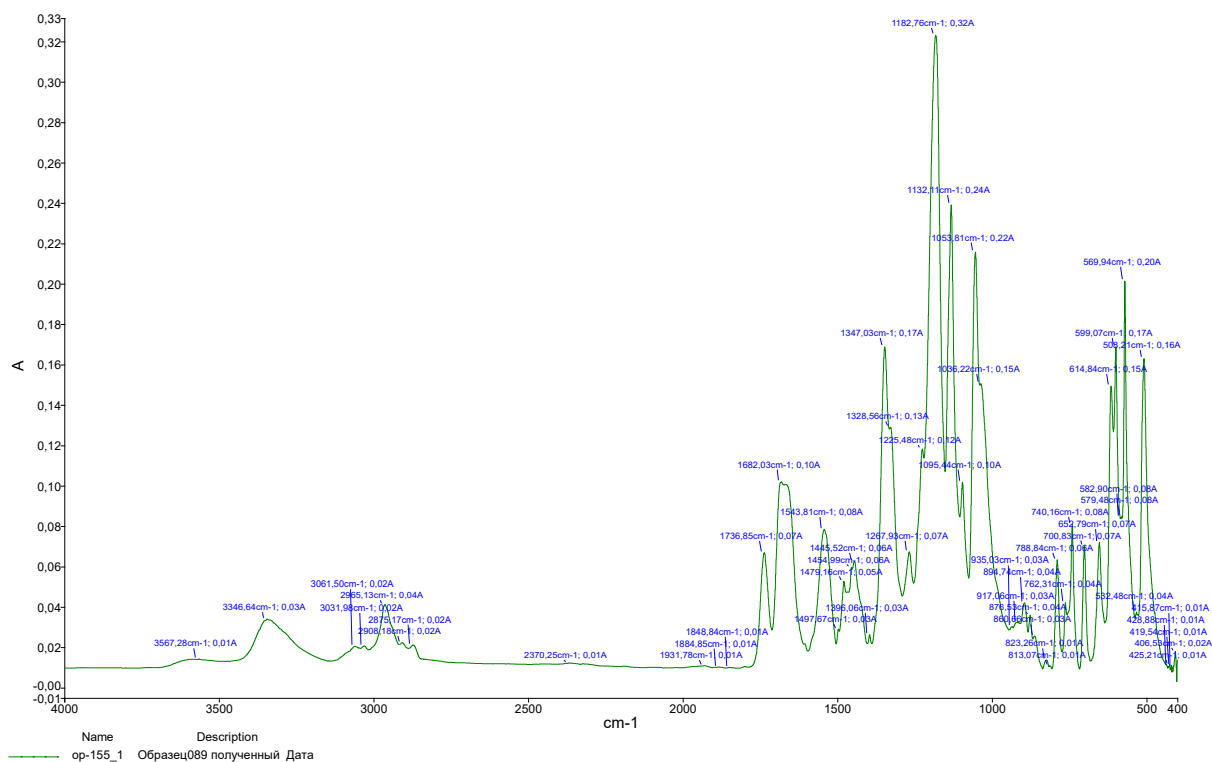

**Figure S23.** IR spectrum of the compound 17 (*cone*).

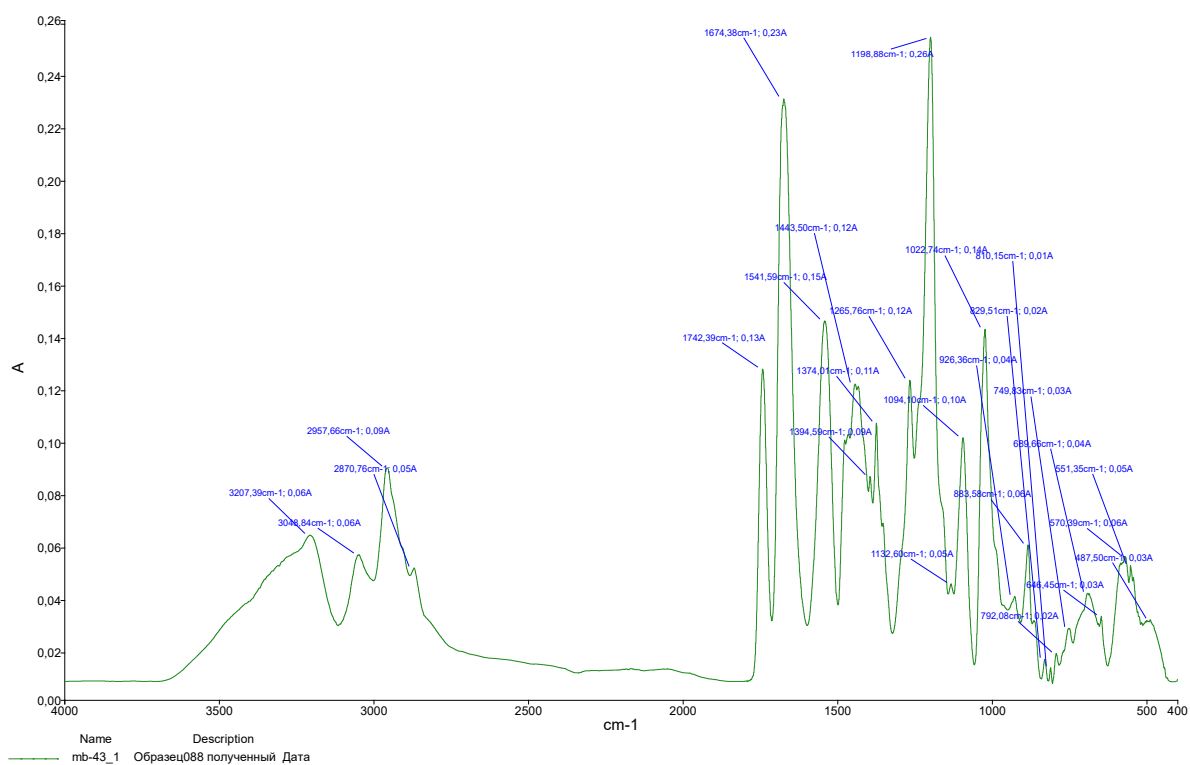

**Figure S24.** IR spectrum of the compound 18 (*partial cone*).

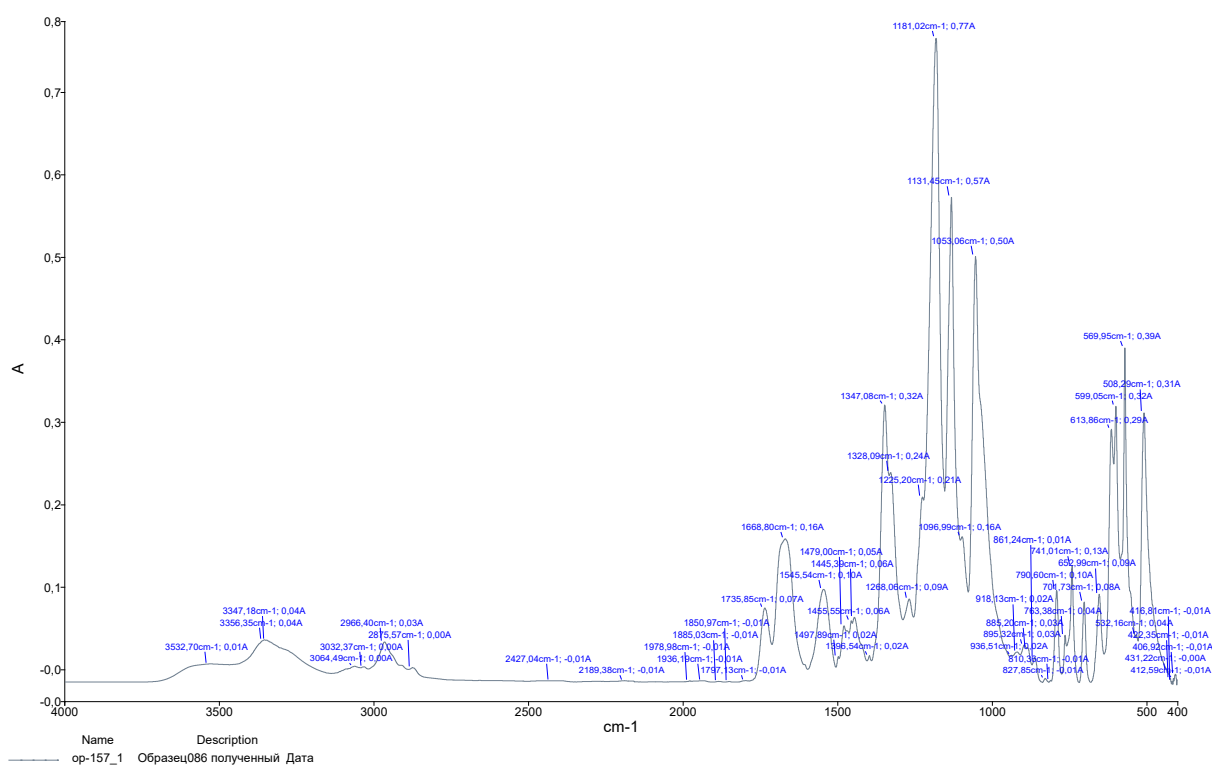

Figure S25. IR spectrum of the compound 19 (*partial cone*).

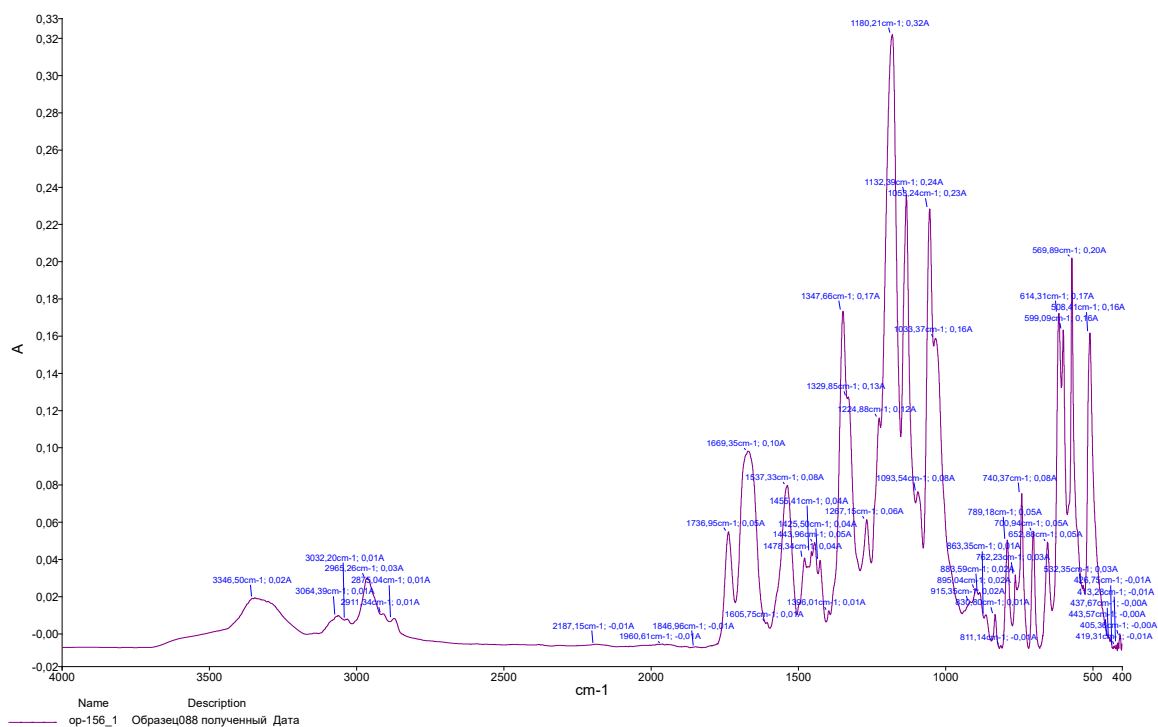

Figure S26. IR spectrum of the compound 21 (*1,3-alternate*).

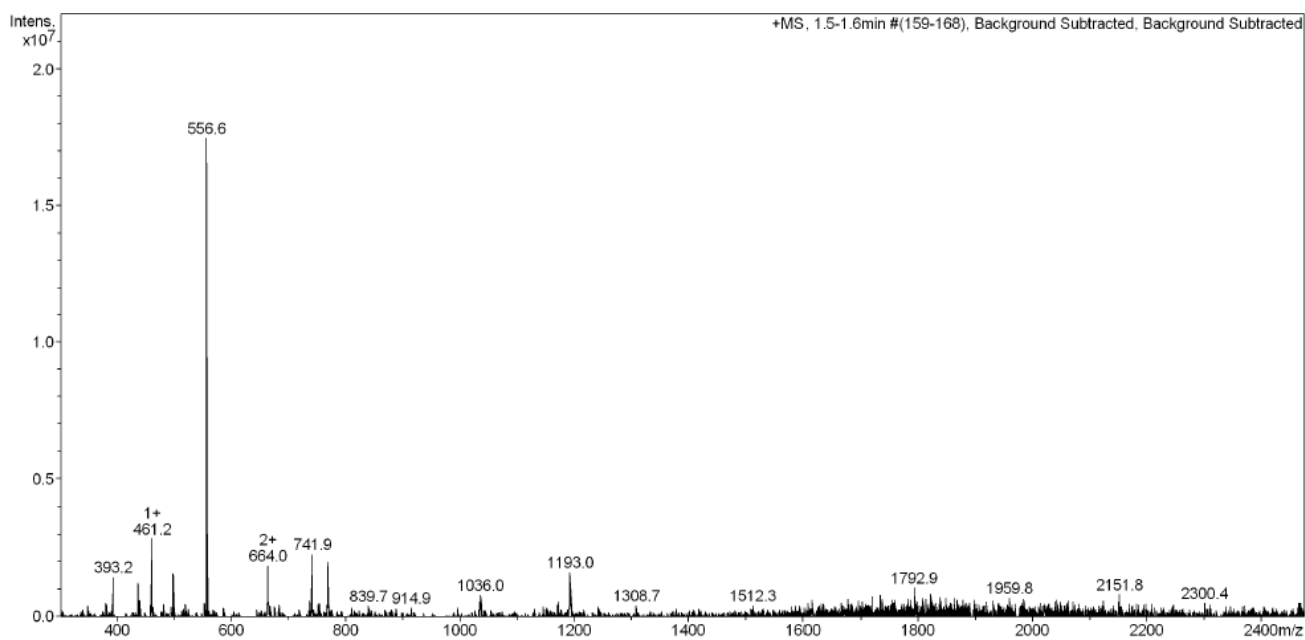

**Figure S27.** Mass spectrum (ESI) of the compound **11** (*cone*).

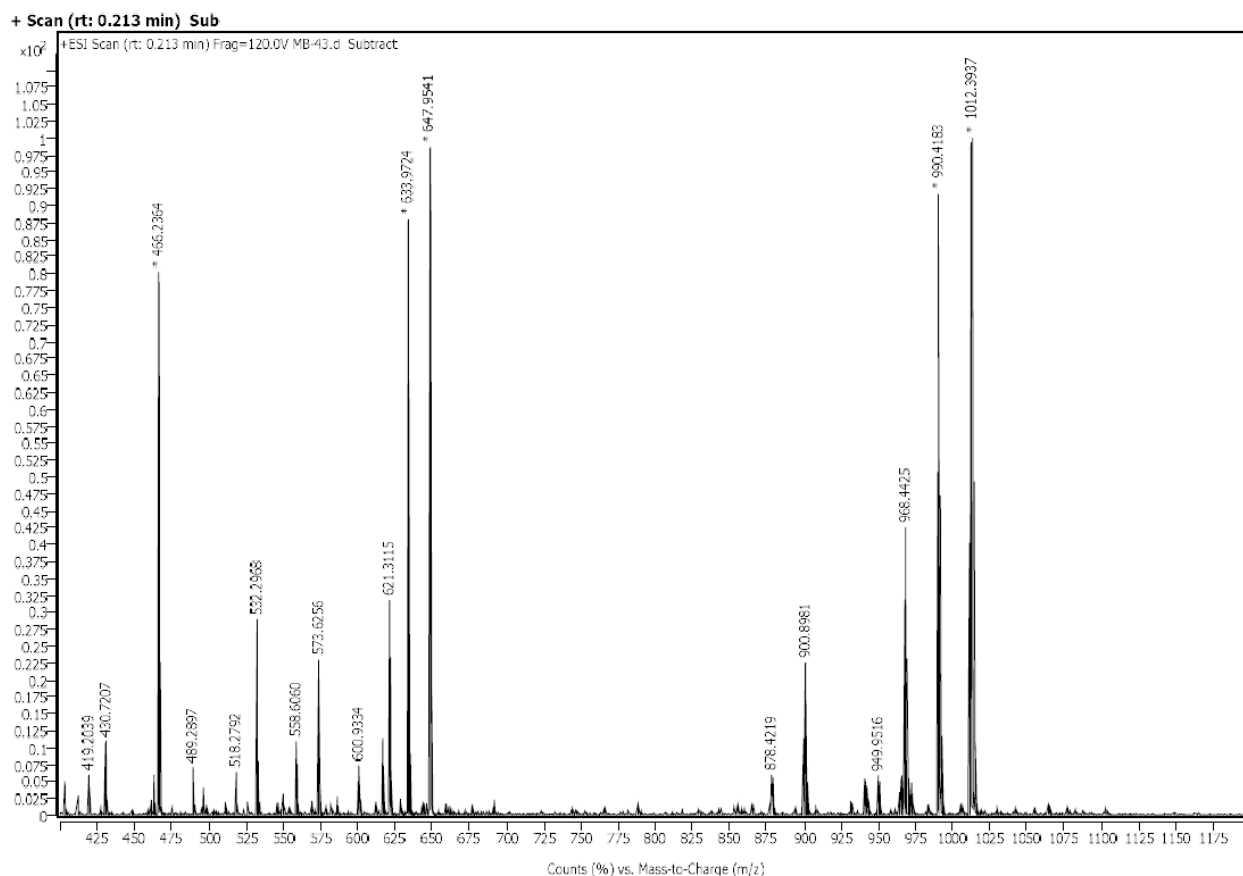

**Figure S28.** HR Mass spectrum (ESI) of the compound **12** (*partial cone*).

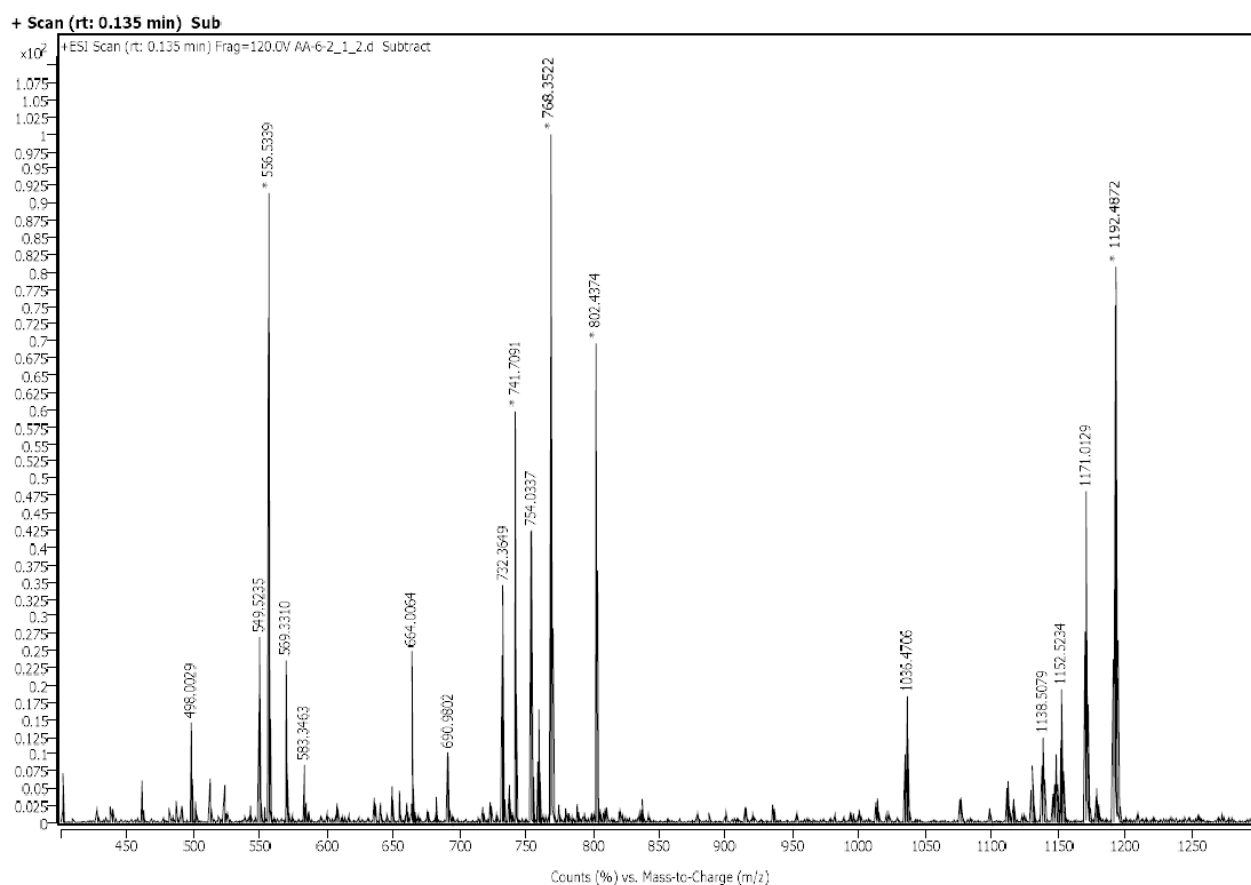

**Figure S29.** HR Mass spectrum (ESI) of the compound **13** (*partial cone*).

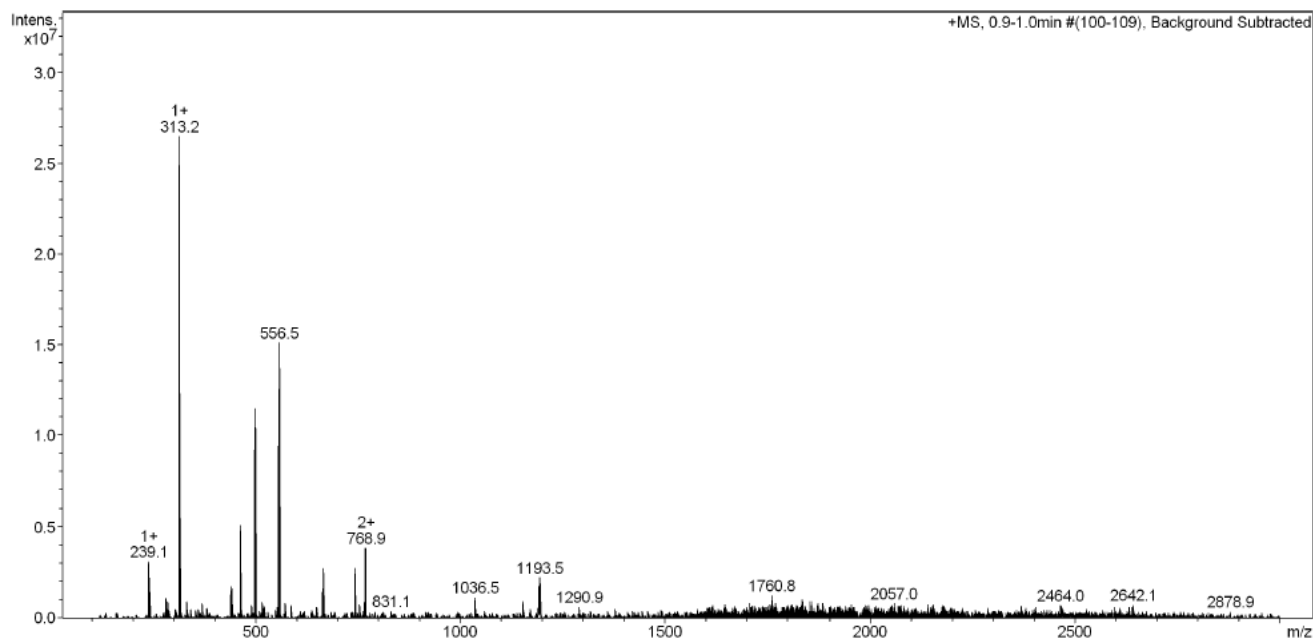

**Figure S30a.** Mass spectrum (ESI) of the compound **15** (*1,3-alternate*).



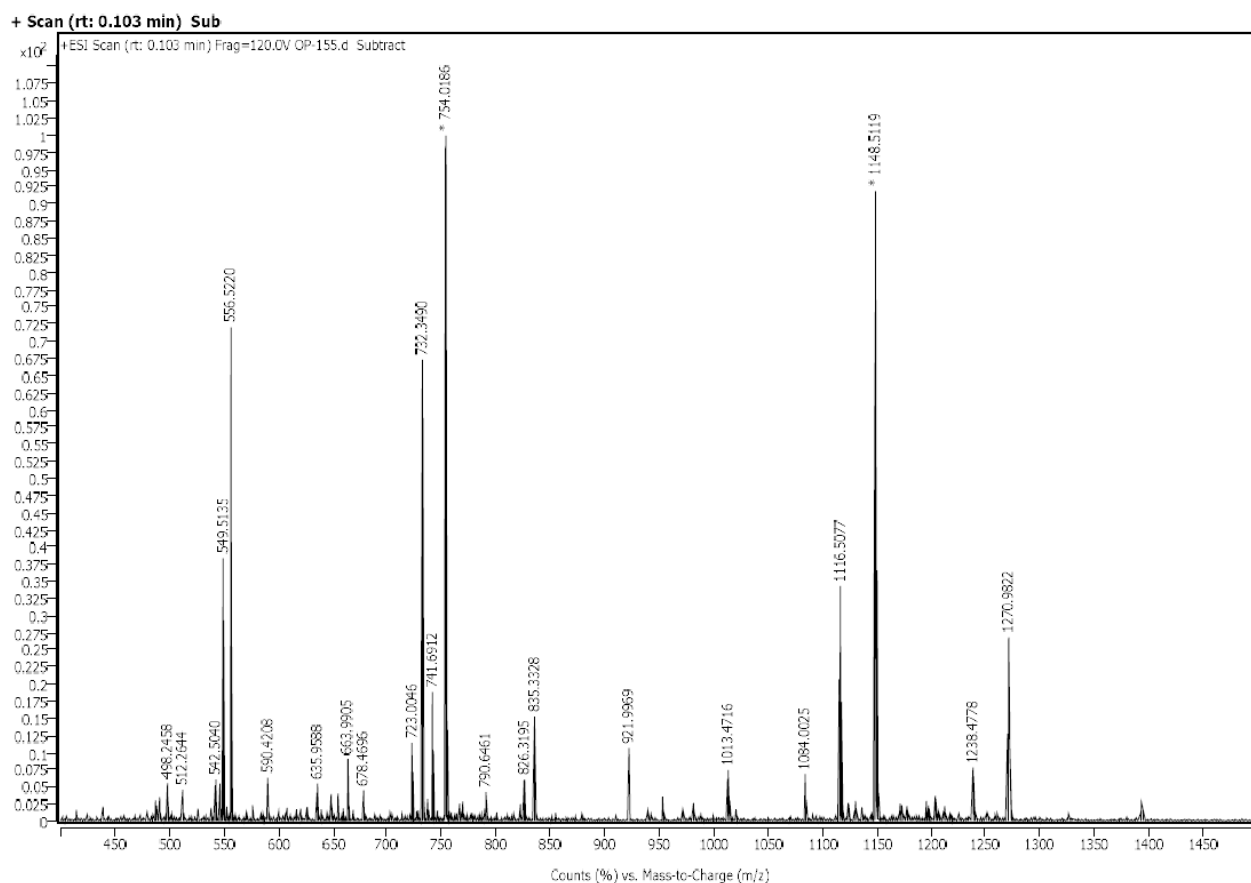

**Figure S30b.** HR Mass spectrum (ESI) of the compound **17** (*cone*).

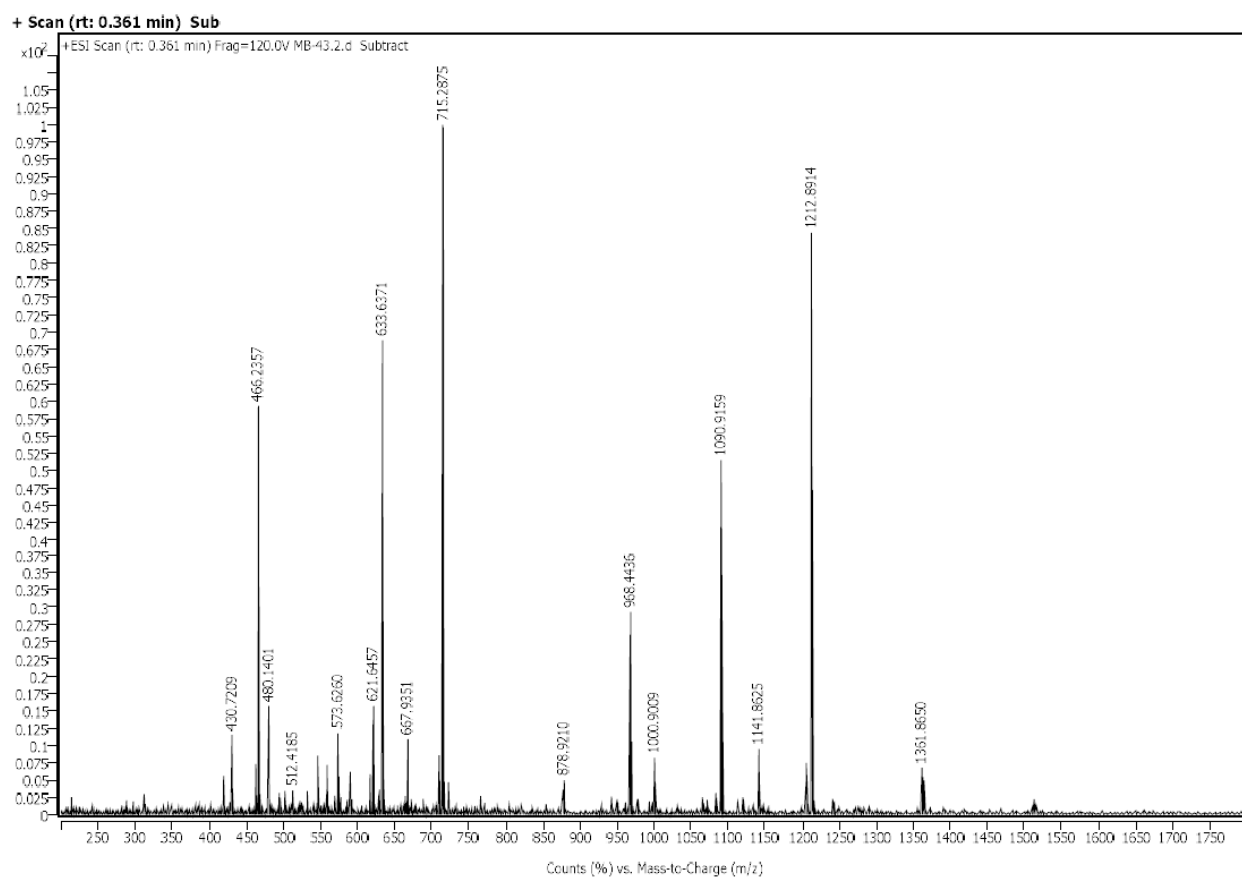

**Figure S31.** HR Mass spectrum (ESI) of the compound **18** (*partial cone*).

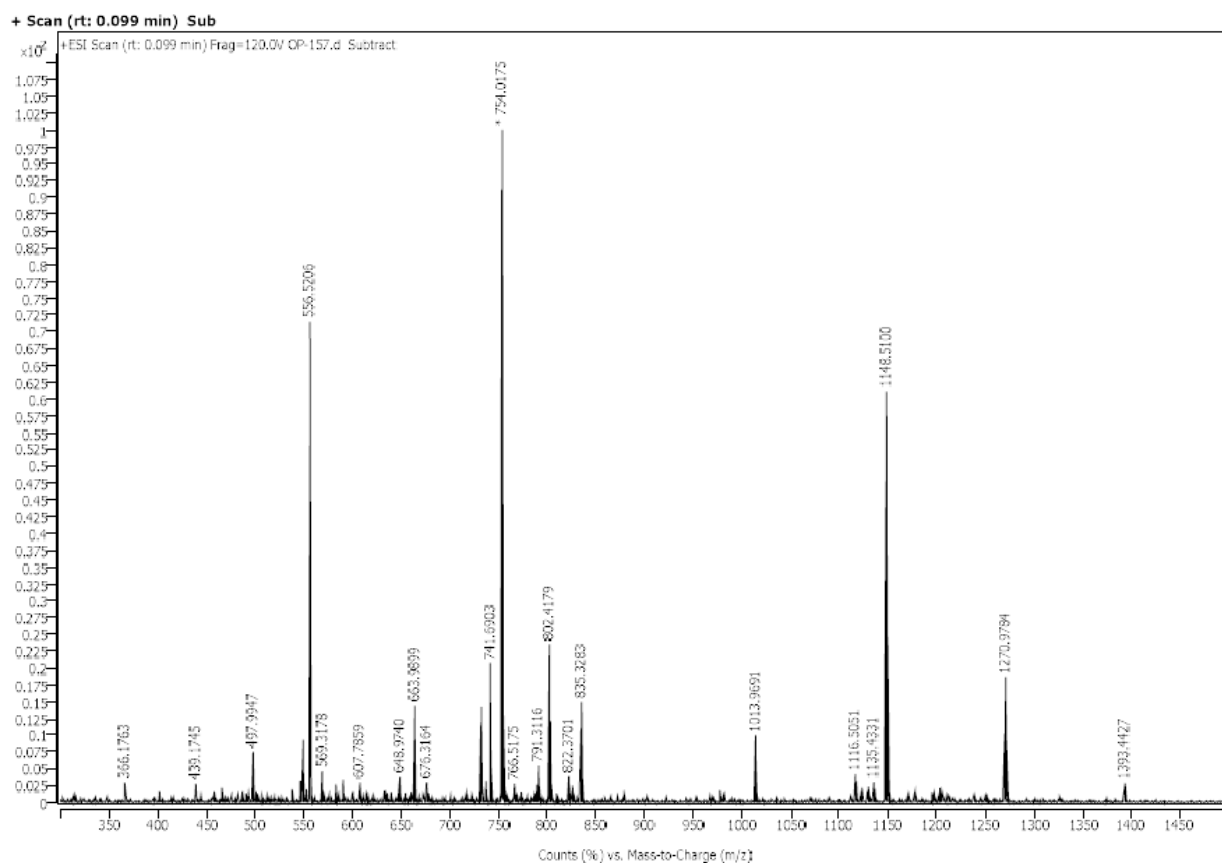

**Figure S32.** HR Mass spectrum (ESI) of the compound **19** (*partial cone*).

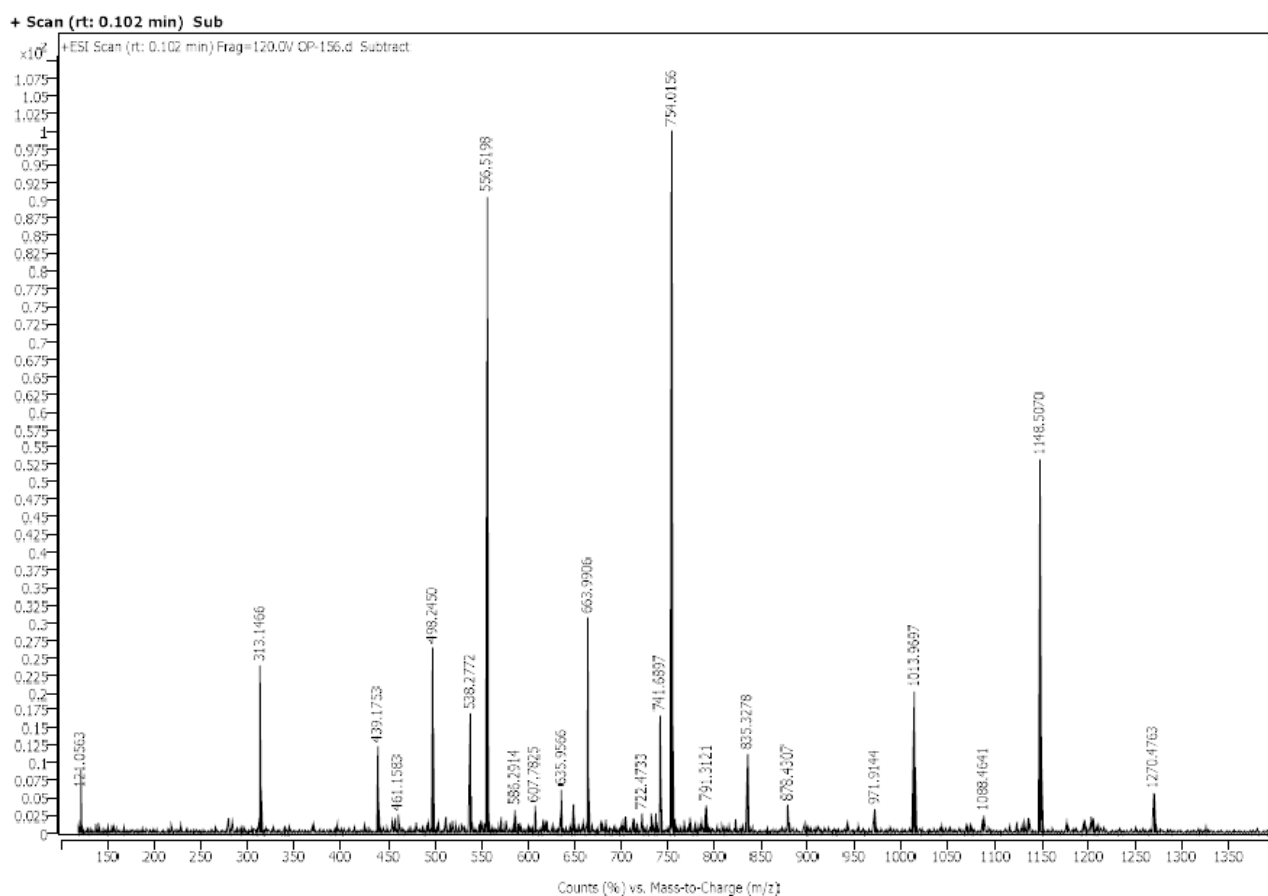

**Figure S33.** HR Mass spectrum (ESI) of the compound **21** (*1,3-alternate*).

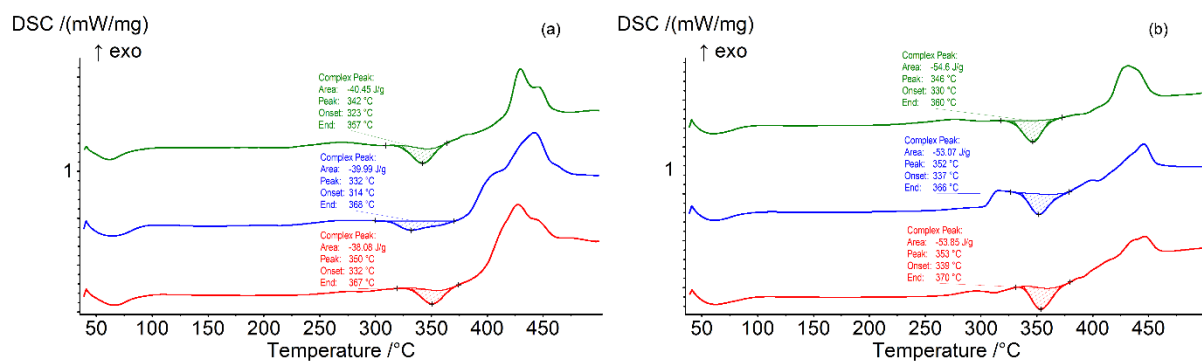

**Figure S34.** DSC curves of the compounds with Gly (a) **16** (green), **18** (blue), **20** (red), and *L*-Phe (b) **17** (green), **19** (blue), **21** (red) fragments (dynamic argon atmosphere of 75 ml/min in the temperature range from 40 to 500 °C).
